# 1            **Nanomechanical phenotypes in cMyBP-C** 2            **mutants that cause hypertrophic cardiomyopathy**

3  
4            Carmen Suay-Corredera<sup>1</sup>, Maria Rosaria Pricolo<sup>1,2</sup>, Diana Velázquez-Carreras<sup>1</sup>, Carolina  
5            Pimenta-Lopes<sup>1</sup>, David Sánchez-Ortiz<sup>1</sup>, Iñigo Urrutia-Irazabal<sup>1</sup>, Silvia Vilches<sup>3,4</sup>, Fernando  
6            Dominguez<sup>1,3,4,5</sup>, Giulia Frisso<sup>2,6</sup>, Lorenzo Monserrat<sup>7</sup>, Pablo García-Pavía<sup>3,4,5,8</sup>, Elías Herrero-  
7            Galán<sup>1</sup>, Jorge Alegre-Cebollada<sup>1,\*</sup>

8  
9            <sup>1</sup> Centro Nacional de Investigaciones Cardiovasculares (CNIC), Madrid, Spain

10           <sup>2</sup> Dipartimento di Medicina Molecolare e Biotecnologie Mediche, Università di Napoli Federico  
11           II, Naples, Italy

12           <sup>3</sup> Heart Failure and Inherited Cardiac Diseases Unit. Department of Cardiology. Hospital  
13           Universitario Puerta de Hierro, Madrid, Spain

14           <sup>4</sup> European Reference Network for Rare and Low Prevalence Complex Diseases of the Heart  
15           (ERN GUARD-HEART, <http://guardheart.ern-net.eu/>)

16           <sup>5</sup> Centro de Investigación Biomédica en Red en Enfermedades Cardiovasculares (CIBERCV),  
17           Madrid, Spain

18           <sup>6</sup> CEINGE Biotecnologie Avanzate, scarl, Naples, Italy

19           <sup>7</sup> Health in Code, A Coruña, Spain

20           <sup>8</sup> Universidad Francisco de Vitoria (UFV), Pozuelo de Alarcón, Madrid, Spain

21  
22  
23  
24  
25  
26  
27  
28  
29  
30  
31  
32  
33  
34           \*To whom correspondence should be addressed: [jalegre@cnic.es](mailto:jalegre@cnic.es). Twitter: @AlegreCebollada

35 **ABSTRACT**

36 Hypertrophic cardiomyopathy (HCM) is a disease of the myocardium caused by mutations in  
37 sarcomeric proteins with mechanical roles, such as the molecular motor myosin. Around half of  
38 the HCM-causing genetic variants target contraction modulator cardiac myosin-binding protein  
39 C (cMyBP-C), although the underlying pathogenic mechanisms remain unclear since many of  
40 these mutations cause no alterations in protein structure and stability. As an alternative  
41 pathomechanism, here we have examined whether pathogenic mutations perturb the  
42 nanomechanics of cMyBP-C, which would compromise its modulatory mechanical tethers across  
43 sliding actomyosin filaments. Using single-molecule atomic force spectroscopy, we have  
44 quantified mechanical folding and unfolding transitions in cMyBP-C mutant domains. Our results  
45 show that domains containing mutation R495W are mechanically weaker than wild-type at forces  
46 below 40 pN, and that R502Q mutant domains fold faster than wild-type. None of these alterations  
47 are found in control, non-pathogenic variants, suggesting that nanomechanical phenotypes  
48 induced by pathogenic cMyBP-C mutations contribute to HCM development. We propose that  
49 mutation-induced nanomechanical alterations may be common in mechanical proteins involved  
50 in human pathologies.

51

52

53 .

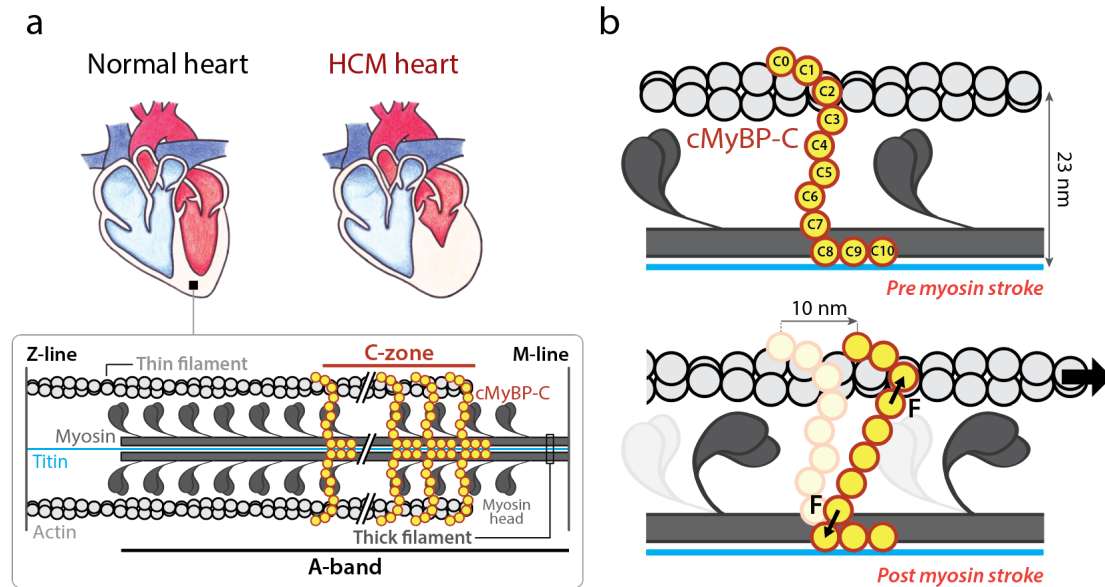

**Figure 1. Overview of the mechanical role of cMyBP-C in the sarcomere. (a)** Comparison of a healthy heart and an HCM counterpart, which shows thicker left ventricular walls and reduced left ventricle volume. *Inset:* schematics of the sarcomere, whose contraction relies on actin-based thin filaments that glide over myosin-containing thick filaments thanks to myosin power strokes. cMyBP-C (in yellow) is located in the C-zone, a part of the A-band of the sarcomere. The M-line and the Z-line structures, which arrange filaments supporting sarcomere organization, are also shown <sup>1</sup>. **(b)** cMyBP-C tethers are subject to mechanical force during a 10 nm myosin power stroke. Interfilament distance is indicated.

54

## 55 INTRODUCTION

56 Hypertrophic cardiomyopathy (HCM) is the most common inherited cardiac muscle disease,  
57 affecting up to 1 in 200 individuals <sup>2-3</sup>. Macroscopically, HCM is characterized by thickened left  
58 ventricular walls and reduced size of the left ventricular chamber, while at the tissue level, HCM  
59 myocardium typically shows interstitial fibrosis and fiber disarray (**Figure 1a**). These structural  
60 changes occur alongside functional defects such as diastolic dysfunction, which can lead to the  
61 most severe consequences of the disease including heart failure and sudden cardiac death <sup>4-6</sup>.  
62 Despite encouraging advances <sup>7</sup>, currently there are no therapies to revert nor prevent HCM  
63 pathogenesis and clinical management relies on long-term palliative treatments and surgical  
64 procedures <sup>4-5</sup>.

65

66 The majority of HCM cases are caused by autosomal dominant mutations targeting mechanical  
67 proteins of the sarcomere, the basic contractile unit of cardiomyocytes <sup>5, 8-9</sup> (**Figure 1a**). In  
68 sarcomeres, myosin heads use the energy coming from ATP hydrolysis to extend from the myosin  
69 backbone in the thick filaments, establish cross-bridges with the neighboring actin thin filaments  
70 and generate ~10-nm power strokes that propel the thin filaments past the thick ones leading to  
71 muscle contraction (**Figure 1b**) <sup>4, 8, 10-12</sup>. Cardiac myosin-binding protein C (cMyBP-C) is a well-  
72 known negative modulator of sarcomere contraction by complex mechanisms that are not fully  
73 understood <sup>13-15</sup>. This multidomain protein is located in the C-zone of the sarcomere, grouped in  
74 nine regularly-spaced transverse stripes that are 43 nm apart from each other <sup>16</sup>. cMyBP-C's C-  
75 terminal C8-C10 domains run axially along the thick filament, interacting both with the myosin  
76 backbone and titin. The central and N-terminal domains of the protein extend radially from the  
77 thick filament towards the thin filament located ~23-nm away (**Figure 1**) <sup>13, 15-20</sup>. In this geometry,  
78 the N-terminal domains of cMyBP-C can interact both with the myosin head region and with the

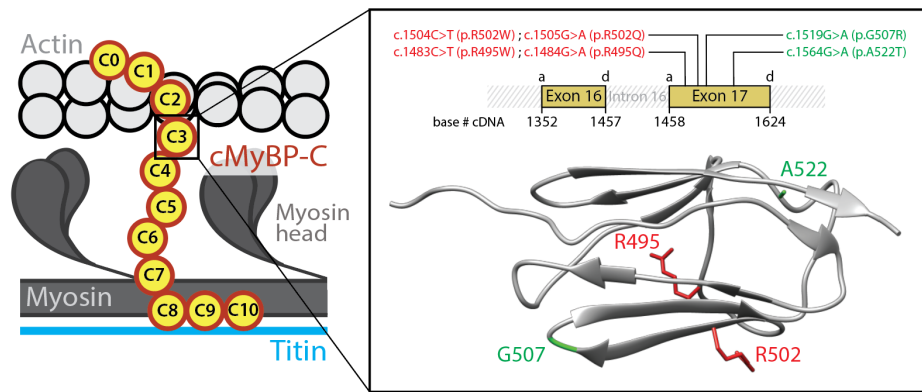

**Figure 2. cMyBP-C variants tested in this report.** The variants target the C3 central domain of cMyBP-C. *Inset:* the variants, which induce single nucleotide substitutions in *MYBPC3* exon 17, are presented using both cDNA and protein nomenclatures. Variants are colored according to their pathogenicity (red: pathogenic mutations; green: non-pathogenic variants). *MYBPC3* exons 16 and 17 codify for C3 domain and the position of their acceptor (a) and donor (d) splicing sites in the cDNA sequence is indicated. The ribbon diagram presents the Ig-like fold of the C3 domain, in which several  $\beta$ -strands arrange in a Greek key  $\beta$ -sandwich (pdb code 2mq0)<sup>27</sup>. The side chains of the residues targeted by the variants are highlighted.

79 actin filament. Since the lifetime of the interaction between cMyBP-C and actin filaments is on  
80 the order of 20 -300 ms<sup>21</sup> and the unloaded velocity of contraction per half sarcomere can be as  
81 high as 7 nm/ms<sup>22</sup>, myosin power strokes are expected to induce substantial mechanical strain on  
82 cMyBP-C, which therefore contributes a viscous load that opposes actomyosin contraction<sup>23</sup>  
83 (**Figure 1b**). Hence, how cMyBP-C tethers respond to mechanical load<sup>24-26</sup> can be fundamental  
84 for its modulatory role on sarcomere power generation.

85

86 *MYH7* and *MYBPC3*, which codify for  $\beta$ -myosin heavy chain and cMyBP-C, respectively, are the  
87 most frequently mutated genes in HCM, accounting for 80% of cases<sup>13, 15, 19</sup>. A large proportion  
88 of pathogenic variants in *MYBPC3* result in cMyBP-C truncations that induce HCM via reduction  
89 in total cMyBP-C content (protein haploinsufficiency)<sup>4, 13, 28-34</sup>. However, many *MYBPC3*  
90 pathogenic mutations only cause single amino acid substitutions that result in full-length, mutant  
91 cMyBP-C proteins that can incorporate into sarcomeres to the same levels as the wild-type protein  
92<sup>19, 29, 31</sup>. The molecular deficits of these missense mutations remain largely unexplored. Some of  
93 them have been proposed to disrupt cMyBP-C interaction with actomyosin filaments<sup>35-37</sup> or to  
94 induce extensive protein destabilization<sup>38-39</sup>; however, many HCM-causing missense mutants  
95 appear to operate via alternative, unidentified mechanisms<sup>40</sup>. Prompted by the ability of cMyBP-  
96 C to establish mechanical tethers that modulate sarcomere contraction (**Figure 1b**), we  
97 hypothesized that HCM-causing mutations may perturb the nanomechanics of cMyBP-C leading  
98 to altered sarcomere activity. Here, we have used single-molecule force spectroscopy by atomic  
99 force microscopy (AFM) to test this hypothesis<sup>41</sup>. We have found that HCM-causing mutations  
100 can affect the mechanical stability and folding rate of the targeted domains, raising the possibility  
101 that alteration of cMyBP-C nanomechanics contributes to HCM pathogenesis.

102

## 103 RESULTS

### 104 Selection of pathogenic and non-pathogenic cMyBP-C variants

105 Following strict assignment of pathogenicity based on clinical and epidemiological data<sup>40</sup>, we  
106 selected 4 pathogenic missense mutations (R495Q, R495W, R502Q and R502W) and 2 non-  
107 pathogenic variants (G507R and A522T) targeting *MYBPC3*. The variants are located in exon 17  
108 of the gene, which together with exon 16 codifies for the C3 domain of cMyBP-C

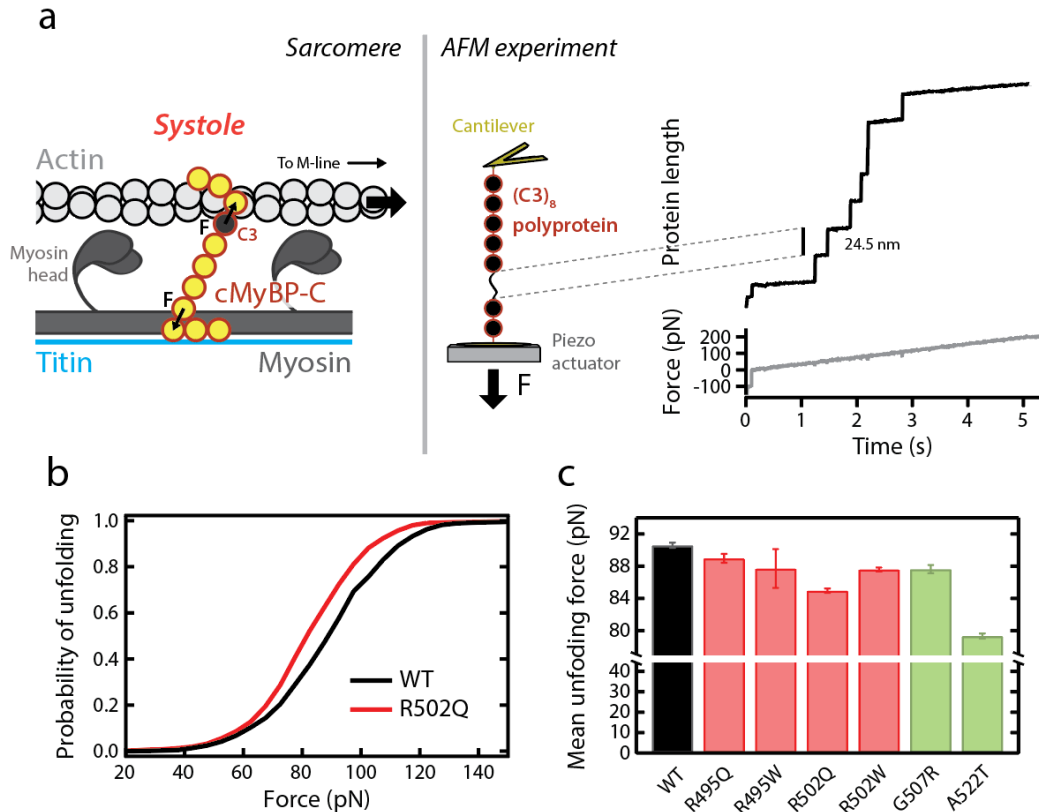

**Figure 3. Characterization of the mechanical stability of WT and mutant C3 domains by single-molecule force-spectroscopy by AFM. (a) Left:** cMyBP-C tethers experience end-to-end mechanical force during the contraction of actomyosin filaments in systole. The position of the C3 domain within cMyBP-C is indicated. **Right:** the mechanical properties of a (C3)<sub>8</sub> polyprotein are measured using single-molecule AFM. In these experiments, a single polyprotein is tethered between a cantilever and a moving piezo actuator, and its length is recorded while a linear increase in force is applied. Unfolding events are detected as step increases in length of 24–25 nm<sup>45</sup>. **(b)** Cumulative probability of unfolding with force for WT (n=1033 unfolding events) and R502Q domains (n=1254 unfolding events). **(c)** Mean unfolding forces, as obtained from Gaussian fits to distributions of unfolding forces (see also **Table 1**). Error bars correspond to 83% confidence intervals. Bars are colored according to the pathogenic status of the mutation (pathogenic, red; non-pathogenic, green).

109 **(Supplementary Text S1; Figure 2)**<sup>42</sup>. No protein interactors have been described for this central  
 110 domain, as expected from the location of C3 far from cMyBP-C's anchoring points to actomyosin  
 111 filaments<sup>43–44</sup>. Hence, mutations targeting C3 are arguably not predicted to affect cMyBP-C  
 112 interactions, which is in agreement with the normal sarcomere localization of cMyBP-C missense  
 113 variants in HCM myocardium<sup>31</sup>. We first verified that the pathogenic mutations do not induce  
 114 defects in RNA splicing or extensive protein structural destabilization, two classical protein  
 115 haploinsufficiency drivers linked to pathogenicity in 45% of cMyBP-C missense mutations<sup>40</sup>.

116

117 Preservation of normal RNA processing in R495Q and R502W mutants has been observed before  
 118 using human myocardial biopsies<sup>31, 46</sup>. In the case of mutation R502Q, no alteration of RNA  
 119 splicing has been detected using the leukocyte fraction of human blood samples<sup>40</sup> and mini-gene  
 120 constructs<sup>47</sup>, two more readily available biological sources that provide results in excellent  
 121 agreement with those obtained using myocardial samples<sup>40</sup>. Using the former method, we studied  
 122 RNA splicing of mutant R495W, and also sought additional validation that R495Q and R502W  
 123 do not induce alteration of RNA splicing. We amplified by RT-PCR the region between exons 15  
 124 and 21 of *MYBPC3* mRNA and observed that amplification of wild-type (WT) and mutant

| Variant | Pathogenic variant | $\langle F_u \rangle$ (pN) | $r_0$ (s <sup>-1</sup> ) | $\Delta x$ (nm) | $r_f$ (s <sup>-1</sup> ) |
|---------|--------------------|----------------------------|--------------------------|-----------------|--------------------------|
| R495Q   | Yes                | 89.0±0.6                   | 0.009±0.001              | 0.25±0.01       | 0.28±0.14                |
| R495W   | Yes                | 87.7±2.4                   | 0.020±0.004              | 0.21±0.01       | 0.11±0.03                |
| R502Q   | Yes                | 85.0±0.3                   | 0.011±0.002              | 0.25±0.01       | 2.1±0.8                  |
| R502W   | Yes                | 87.6±0.2                   | 0.012±0.002              | 0.23±0.01       | 0.08±0.02                |
| G507R   | No                 | 87.6±0.5                   | 0.009±0.001              | 0.25±0.01       | 0.17±0.10                |
| A522T   | No                 | 79.3±0.3                   | 0.009±0.001              | 0.28±0.01       | 0.14±0.04                |
| WT      | -                  | 90.6±0.3                   | 0.012±0.002              | 0.22±0.01       | 0.16±0.06                |

**Table 1. Nanomechanical properties of WT and mutant C3 domains.** Errors are 83% confidence intervals of the fittings used to calculate the mechanical parameters. If these intervals do not overlap, differences are considered statistically significant (see Methods).

125 samples results in bands at the ~700 bp expected electrophoretic mobility (**Supplementary**  
126 **Figure S1a; Supplementary Text S1**). Preservation of canonical RNA splicing in the mutants  
127 was further confirmed by Sanger sequencing, which allows the detection of the variants in  
128 heterozygosis and the visualization of the correct 16/17 and 17/18 exon-exon boundaries  
129 (**Supplementary Figure S1b**).

130

131 To examine mutant protein stability, we did far-UV circular dichroism (CD) experiments using  
132 recombinant domains (**Supplementary File S1; Supplementary Figure S2a**). In agreement with  
133 previous reports, we found that WT and mutant domains have highly similar CD spectra showing  
134 a minimum at 215 nm, typical of  $\beta$ -structure-containing proteins<sup>27, 40, 48</sup> (**Supplementary Figure**  
135 **S3a**). The only remarkable difference was found in the spectrum of R502W, which displays lower  
136 CD signal at 230 nm (**Supplementary Figure S3b**). Since the high-resolution structures of C3  
137 WT and R502W are very similar<sup>27</sup>, we interpret this change as originating from the absorption  
138 of the extra tryptophan in the mutant<sup>49</sup>. To explore if mutations induce structural destabilization,  
139 we examined the stability of the mutant domains at increasing temperatures by tracking the CD  
140 signal at 215 nm (**Supplementary Figure S4a**). The temperature at the midpoint of the denaturing  
141 transition, or melting temperature ( $T_m$ ), informs about the thermal stability of the domain. All  
142 mutations retain close-to-WT thermal stability (**Supplementary File S1; Supplementary Figure**  
143 **S4b**). The maximum drop in  $T_m$  was 5.3°C for mutant R502Q; however, this limited decrease in  
144 thermal stability can also be found in non-pathogenic missense variants targeting C3 and therefore  
145 cannot explain the pathogenicity of the mutation<sup>40</sup>. In summary, none of the pathogenic variants  
146 studied in this report induce extensive protein destabilization.

147

#### 148 **Mechanical destabilization in mutant cMyBP-C domains**

149 The results in the previous section show that the selected pathogenic *MYBPC3* missense mutations  
150 preserve RNA splicing and protein thermal stability and thus it is unlikely that they cause HCM  
151 through classical protein haploinsufficiency. Most probably, these mutants are incorporated into  
152 the sarcomere but fail to provide proper functionality<sup>31, 50</sup>. Since cMyBP-C tethers are subject to  
153 mechanical force in the sarcomere (**Figure 1b**), we used AFM to examine whether mutations alter  
154 the mechanical stability of the C3 domain (**Figure 3**). We first produced polyproteins consisting  
155 of eight repetitions of the WT or the mutant C3 domains (**Supplementary File S1;**  
156 **Supplementary Figure S2b**). Using AFM, these polyproteins were subject to 40 pN/s increasing  
157 pulling force while monitoring their length. Mechanical unfolding of a C3 domain within the  
158 polyprotein results in the extension of the polypeptide by 24-25 nm. The presence of multiple  
159 such unfolding steps fingerprints successful single-polyprotein recordings (**Figure 3a**)<sup>45</sup>. We

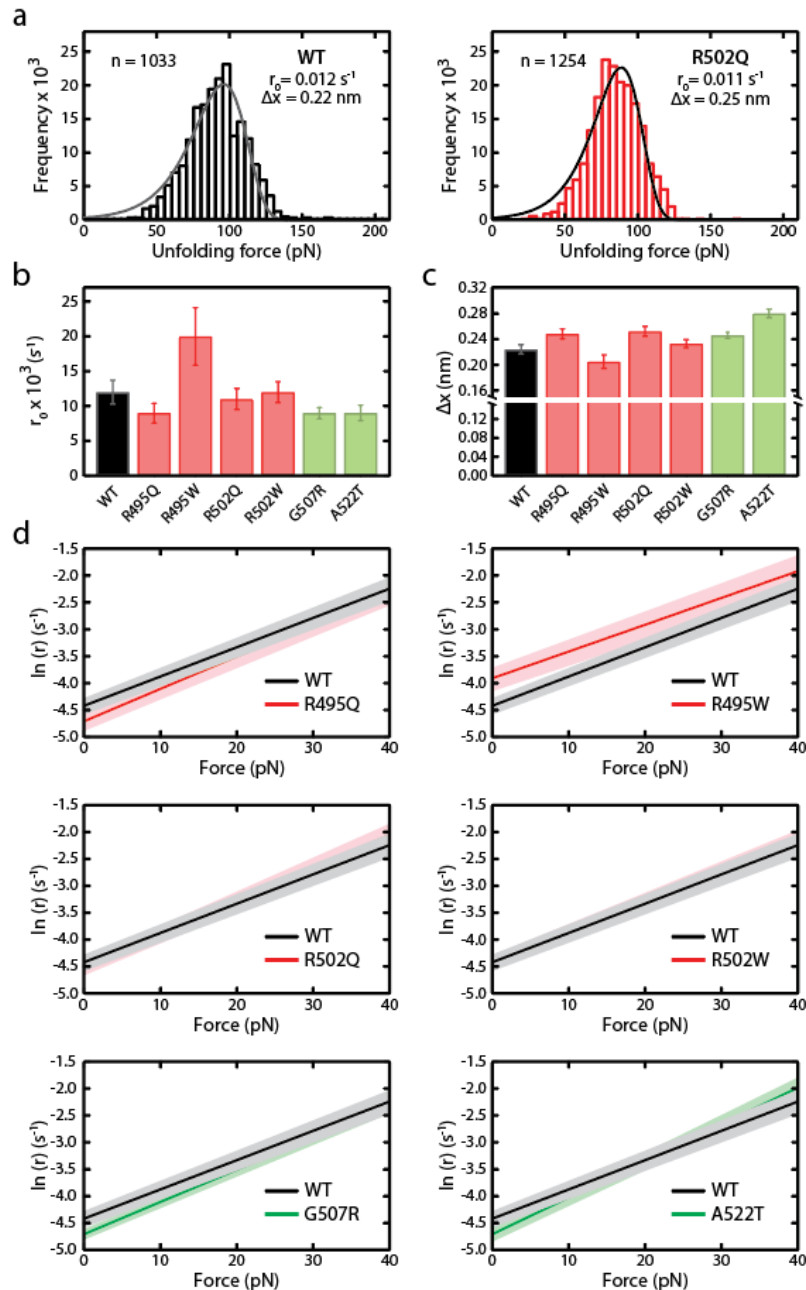

**Figure 4. Characterization of  $r_0$  and  $\Delta x$  parameters of WT and mutant C3 domains according to Bell's model.** (a) Distribution of unfolding forces obtained for WT and R502Q domains. Distributions were fit to Bell's model<sup>51</sup> (fitting lines in black) and the resulting rate of unfolding at zero force,  $r_0$ , and distance to the transition state,  $\Delta x$ , are indicated. (b,c)  $r_0$  and  $\Delta x$  values for WT and mutant C3 domains (see also **Supplementary Figure S5** and **Table 1**). Error bars correspond to 83% confidence intervals. Bars are colored according to the pathogenic status of the mutation (pathogenic, red; non-pathogenic, green). (d) Force dependency of rates of unfolding according to Bell's model (red: pathogenic, green: non-pathogenic). 83% confidence intervals are indicated as shaded areas.

160 measured the force at which mechanical unfolding occurs for hundreds of WT and mutant  
 161 domains, and built distributions of unfolding forces (**Figure 3b; Figure 4a; Supplementary**  
 162 **Figure S5**). We found that the mean unfolding force ( $\langle F_u \rangle$ ) of WT C3 domain is  $90.6 \pm 0.3$  pN,  
 163 in agreement with previous measurements on cMyBP-C multidomain constructs<sup>24, 26</sup>. All  
 164 pathogenic and non-pathogenic variants induce slight mechanical destabilization under our  
 165 experimental conditions, as indicated by lower mean unfolding forces (**Figure 3c; Table 1**).

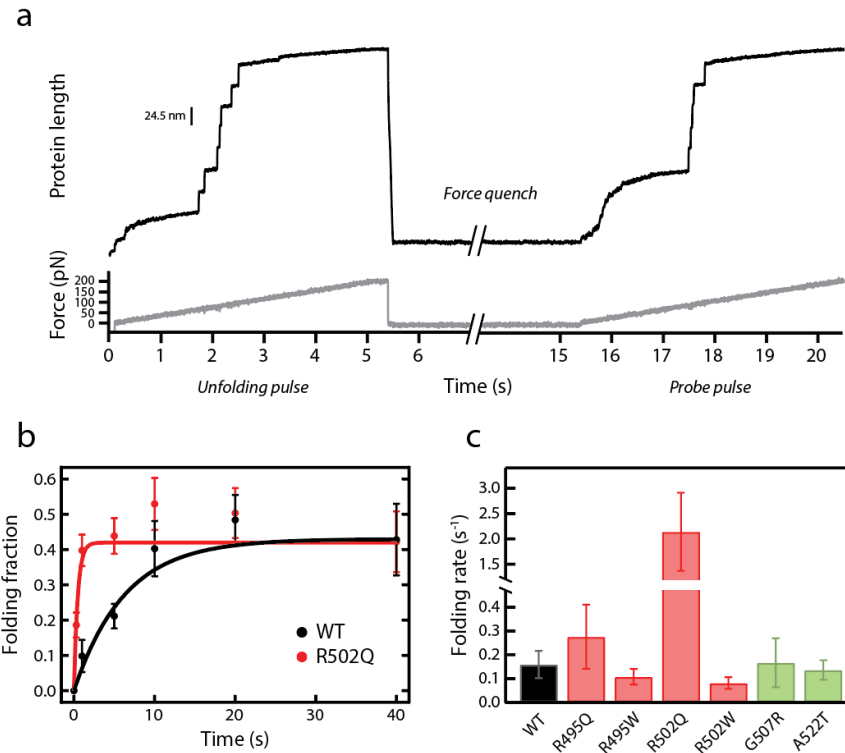

**Figure 5. Characterization of mechanical folding of WT and mutant C3 domains.** (a) Representative trace of mechanical refolding experiments by AFM. A single  $(C3)_8$  polyprotein is subject to an *unfolding* pulse, then force is quenched to 0 pN and finally the protein is pulled again to high forces in a *probe* pulse. Folding fractions are calculated comparing the number of unfolding events in the *probe* and the *unfolding* pulses. In the example shown, 5 out of 7 domains refolded during the *quench* pulse. (b) Folding fractions of C3 WT and R502Q at different quench times. Lines are exponential fits to the data. Error bars are standard errors of the mean estimated by bootstrapping<sup>53</sup> ( $n \geq 56$  and  $n \geq 86$  unfolding events for all WT and R502Q data points, respectively). (c) Mechanical folding rates for C3 WT and its mutants, obtained from exponential fits to refolding data (see also **Supplementary Figure S6** and **Table 1**). Error bars are 83% confidence intervals. Bars are colored according to the pathogenic status of the mutation (pathogenic, red; non-pathogenic, green).

166

167 Experimental  $\langle F_u \rangle$  values are a consequence of the underlying free energy landscapes and the  
 168 specific pulling conditions. Extrapolation of AFM data to alternative ranges of forces can be  
 169 achieved using models that consider how the energy landscape is shaped by the applied  
 170 mechanical force. We have done so by fitting our data to the Bell's model (**Figure 4a**;  
 171 **Supplementary Figure S5**)<sup>51-52</sup>. According to this model, the rate of mechanical unfolding ( $r$ )  
 172 is dependent on force ( $F$ ) according to,

173

$$174 \quad r = r_0 \cdot e^{F \cdot \Delta x / k_b \cdot T} \quad \text{Equation 1}$$

175

176 where  $r_0$  is the rate of unfolding at zero force,  $\Delta x$  is the distance to the transition state of the  
 177 mechanical unfolding reaction,  $k_b$  is the Boltzmann constant and  $T$  is the absolute temperature.  
 178 Fits show that both pathogenic and non-pathogenic mutations can affect  $r_0$  and/or  $\Delta x$ , therefore  
 179 altering the mechanical behavior of C3 domains in a force-dependent manner (**Figure 4b,c**; **Table**  
 180 **1**). Using the parameters obtained from the fits, we estimated mechanical unfolding rates at low  
 181 forces, which are challenging to probe experimentally using AFM but can be relevant in the  
 182 context of cMyBP-C function in the sarcomere. This analysis showed that R495W domains unfold



183 significantly faster than WT counterparts at forces below 40 pN, whereas the rest of the mutants  
184 behave very similarly to WT, including control, non-pathogenic variants (**Figure 4d**).

185

### 186 **Mechanical folding in missense mutants of cMyBP-C**

187 To determine the ability of the different C3 domains to refold following mechanical unfolding,  
188 we did *unfolding-quench-probe* experiments (**Figure 5a**)<sup>54</sup>. In these experiments, proteins are  
189 first pulled in a force ramp to high forces (*unfolding* pulse). Then, force is relaxed to 0 pN, at  
190 which domains can regain the folded state (*quench* pulse). Finally, in the *probe* pulse, the protein  
191 is pulled back to high forces. Unfolding steps in the *probe* pulse report on domains that refolded  
192 during the *quench* pulse. To obtain folding fractions, the number of unfolding events in the *probe*  
193 and *unfolding* pulses are compared. Folding rates were estimated by measuring folding fractions  
194 at different quench times. Compared to WT, mutant R502Q shows a 13x increased folding rate  
195 ( $r_f$ ). The remaining pathogenic mutations and non-pathogenic variants do not cause significant  
196 changes in the folding rate (**Figure 5b,c; Supplementary Figure S6; Table 1**).

197

### 198 **DISCUSSION**

199 It has been proposed that HCM mutations lead to increased sarcomeric output and myocyte  
200 hypercontractility<sup>55-58</sup>. Indeed, mavacamten, an inhibitor of myosin motor activity, is able to  
201 prevent development of HCM in mouse models<sup>59</sup> and also shows beneficial effects in clinical  
202 trials<sup>7</sup>. Many HCM-causing mutations in myosin affect directly the mechanochemical cycle of  
203 the protein resulting in enhanced force generation<sup>60-61</sup>. Interestingly, the proportion of low-  
204 activity SRX myosin heads is decreased in HCM myocytes devoid of cMyBP-C but is normalized  
205 upon treatment with mavacamten<sup>57, 62-63</sup>. The emerging unifying view is that, regardless of the  
206 specific mutation, HCM is primarily a mechanical disease at the molecular level; however, it  
207 remains unknown how missense mutations in the central region of cMyBP-C can lead to  
208 hypercontractility<sup>64</sup>. In this work we have studied several pathogenic mutations targeting the  
209 central C3 domain of cMyBP-C, the region of the protein with the highest number of HCM-  
210 causing missense mutations<sup>13</sup>. We verified that our variants do not induce classical protein  
211 haploinsufficiency drivers specifically associated with other HCM mutations (**Supplementary**  
212 **Figure S1, S3, S4**)<sup>40</sup>. Hence, these variants trigger HCM by yet-to-identify molecular  
213 mechanisms.

214

215 The modulatory mechanisms of cMyBP-C on contraction are complex and far from being  
216 completely understood. While the C8-C10 C-terminal domains of cMyBP-C play a structural role  
217 providing strong anchorage to the thick filament, the C0-C2 N-terminal fragments can bind both  
218 actin filaments and myosin globular heads resulting in sophisticated control of their activity  
219 through direct mechanical load (**Figure 1b**) or via conformational changes that are dependent on  
220 phosphorylation and calcium levels<sup>15</sup>. In this highly intricate regulatory landscape, several  
221 possibilities can be envisioned by which altered cMyBP-C nanomechanics, as detected here for  
222 R495W and R502Q (**Figures 4d, 5c**), can perturb sarcomere function.

223

224 Let us first consider a purely mechanical scenario. Current models on cMyBP-C modulation of  
225 sarcomere contraction state that the central region of the protein is subject to end-to-end  
226 mechanical force that results in a viscous drag opposing contraction (**Figure 1b**)<sup>15, 21, 23-24, 65-66</sup>.  
227 This drag force depends on cMyBP-C stiffness. If we assume that 5 cMyBP-C domains bridge  
228 radially the thick and thin filaments<sup>16</sup>, using the freely jointed chain (FJC) model of polymer  
229 elasticity<sup>67</sup>, we can predict that the force experienced by cMyBP-C tethers increases by >250%  
230 during a 10-nm myosin power stroke (4.4 nm contour length, Lc, per domain, and 20 nm Kuhn

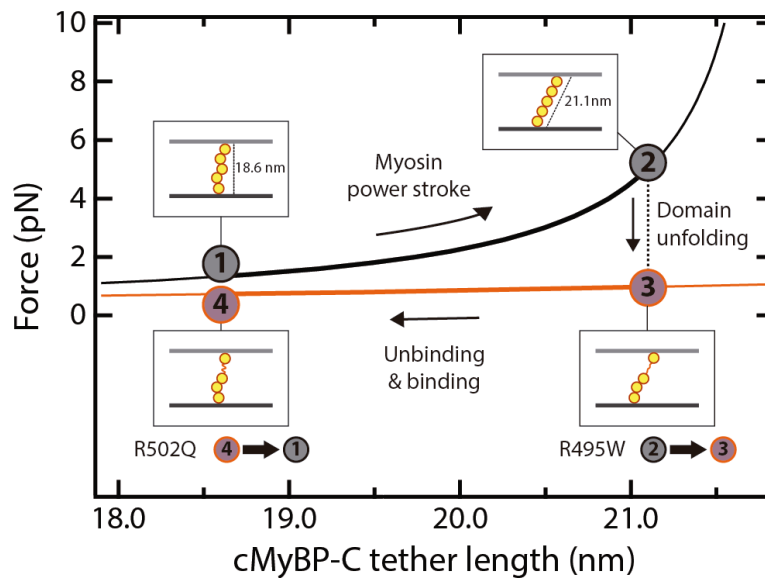

**Figure 6. Model of mechanical modulation by cMyBP-C tethers and the influence of domain unfolding.** FJC-estimated increase in force generated by a fully folded cMyBP-C tether (black) during a myosin power stroke. If one of the domains of cMyBP-C unfolds, force is reduced (orange). The model considers a radial distribution of domains C3-C7<sup>16</sup>, and that anchoring C2 and C8 domains (not shown for simplicity) are located at the center of the thin and thick filaments, respectively, so that they contribute half their diameter to bridge the 23-nm interfilament space<sup>20</sup>. The increase in cMyBP-C length during a myosin power stroke was estimated using the Pythagorean theorem considering a 10 nm power stroke<sup>12</sup>. In the graph, we also considered that cMyBP-C can dissociate from actin sites at a slower rate than that of myosin power strokes. Mutation R495W increases the rate of mechanical unfolding of C3, whereas R502W leads to faster C3 folding at low forces.

231 length, Lk)<sup>68</sup> (**Figure 6**). This force is expected to decrease to less than pre-power-stroke values  
 232 if a cMyBP-C domain mechanically unfolds in the process (Lc = 0.4 nm per amino acid, 90 amino  
 233 acid domain size, Lk = 1.32 nm for unfolded polypeptide regions)<sup>68</sup>. According to our AFM data,  
 234 this low-force state is up to 66% more frequent in mutant R495W (**Figure 4d**), which is expected  
 235 to reduce the average viscous load generated by mutated cMyBP-C. We speculate that the higher  
 236 speed of folding detected for R502Q could alter other steps of the mechanochemical cycle of  
 237 actomyosin filaments, for instance by generating more mechanical work during relaxation<sup>69</sup>. It is  
 238 important to stress that force estimates in **Figure 6** are highly dependent on the specific geometry  
 239 of cMyBP-C tethers and on the mechanical parameters considered. Although the model  
 240 exemplifies how cMyBP-C's viscous load can be reduced by mechanically labile domains, the  
 241 exact forces experienced by cMyBP-C in the sarcomere, which so far remain unknown, may differ  
 242 from the values shown in **Figure 6**.

243

244 The interaction of cMyBP-C terminal domains with several sarcomeric proteins, resulting in  
 245 modulation of their activity, is well documented<sup>15</sup>. The possibility exists that the central domains  
 246 of cMyBP-C transiently participate in those binding reactions, or have yet unidentified binding  
 247 partners. Hence, as described in mutants targeting terminal cMyBP-C domains<sup>36, 70-71</sup>, mutations  
 248 in central domains of cMyBP-C could also interfere with binding reactions either directly or  
 249 allosterically. Interestingly, the interactome of proteins under force, such as titin and talin, is  
 250 dependent on mechanical load<sup>54, 72</sup>. Hence, the mechanical unfolding of cMyBP-C central  
 251 domains could result in the exposure of cryptic binding sites. In this scenario, altered mutant  
 252 cMyBP-C nanomechanics would also cause perturbations of the interaction landscape of cMyBP-  
 253 C.

254

255 Truncating mutations in cMyBP-C that cause HCM result in normal levels of mutated mRNA but  
256 no detectable truncated polypeptide in the myocardium, probably due to its degradation by  
257 cellular protein quality control systems, such as the ubiquitin/proteasome system (UPS). Beyond  
258 insufficient mechanical modulation in cMyBP-C deficient myocardium, the exhaustion of these  
259 protein control systems can also contribute to the pathogenesis of HCM<sup>73-76</sup>. Since mechanical  
260 destabilization results in increased protein unfolding, a well-known trigger of the UPS<sup>77</sup>, it is  
261 possible that nanomechanical destabilization of cMyBP-C missense mutants can result in  
262 activation of protein quality control systems.

263

264 In summary, our single-molecule experiments reveal that pathogenic missense mutations in  
265 cMyBP-C can induce mechanical destabilization and alterations in the mechanical folding  
266 properties of the targeted domain. We propose that these nanomechanical phenotypes, which are  
267 not found in non-pathogenic variants, can perturb the function of cMyBP-C in the sarcomere by  
268 several mechanisms, potentially contributing to HCM pathogenesis. Similar nanomechanical  
269 phenotypes may be also found in pathogenic mutations targeting other proteins with mechanical  
270 roles, such as titin<sup>78</sup>, talin<sup>79</sup>, filamin<sup>80</sup>, lamin<sup>81</sup>, and  $\alpha$ -catenin<sup>82</sup>. Future studies will investigate  
271 the prevalence of nanomechanical phenotypes in other cMyBP-C mutations, and their impact in  
272 low-force transitions that are now amenable for experimental observation<sup>83</sup>.

273

## 274 **METHODS**

### 275 **Human samples**

276 The procurement of human samples was achieved following the principles outlined in the  
277 Declaration of Helsinki according to a project approved by the *Comité de Ética de Investigación*  
278 of *Instituto de Salud Carlos III* (PI 39\_2017) and by the Ethics Committee of the Naples  
279 University Federico II “Carlo Romano” (Protocol number 157/13).

280

### 281 **Analysis of RNA splicing**

282 Leukocytary fractions from carrier’s venous blood were treated with Trizol (Thermo Fisher  
283 Scientific) to extract total RNA. Then, cDNA was obtained by retro-transcription of total RNA  
284 with random primers and Superscript<sup>TM</sup> IV VILO<sup>TM</sup> Master Mix (Thermo Fisher Scientific). To  
285 amplify the region spanning *MYBPC3* exons 15 through 21, we used primers MyBPC Forward  
286 (5'-CAAGCGTACCCTGACCATCA-3') and MyBPC Reverse (5'-  
287 GGATCTTGGGAGGTTCCCTGC-3'). To avoid amplification of genomic DNA, the annealing  
288 region of the reverse primer targets the exon 20/21 junction (**Supplementary Text S1**). The  
289 resulting PCR amplification products were purified using the Qiaquick PCR purification Kit  
290 (Qiagen). Finally, the purified fragments were sequenced using the Sanger method. We consider  
291 that standard RNA processing is not altered when electropherograms allow the unambiguous  
292 reading of the expected WT *MYBPC3* cDNA sequence at the junction between exons 16, 17 and  
293 18. Since patients carry mutations in heterozygosis, a double peak corresponding to the WT and  
294 mutated base was detected at the variant position, as expected.

295

### 296 **Protein expression and purification**

297 The production and purification of the (C3)<sub>8</sub> polyproteins was done as reported before<sup>45</sup>, except  
298 for the case of non-pathogenic variants, which were also expressed by overnight induction of  
299 BLR(DE3) *E.coli* cultures with 0.4 mM isopropyl  $\beta$ -d-l-thiogalactopyranoside, at 18°C and 250  
300 rpm agitation. Mutations were introduced by PCR. Polyprotein-coding mutated cDNAs were  
301 obtained by an iterative cloning strategy using BamHI, BglII and KpnI restriction enzymes, as

302 described<sup>84-85</sup>. To produce monomeric C3 domains, the corresponding cDNA was cloned in a  
303 custom-modified pQE80L plasmid using BamHI and BglIII restriction enzymes. Sanger  
304 sequencing was performed on all final expression plasmids. Monomers and mutant polyproteins  
305 were purified following the same protocol as for wild-type (C3)<sub>8</sub><sup>45</sup>, which includes two rounds  
306 of purification using nickel-based affinity and size-exclusion chromatographies. In this final step,  
307 elution was carried out in 10 mM Hepes, pH 7.2, 150 mM NaCl, 1 mM EDTA for polyproteins,  
308 while monomers were recovered in 20 mM NaPi, pH 6.5 and 63.6 mM NaCl. Proteins were stored  
309 at 4°C. SDS-PAGE analysis was carried out to evaluate the isolating process and to identify the  
310 purest and highest concentrated fractions.

311

### 312 **Circular dichroism**

313 CD experiments were conducted in a Jasco J-810 spectropolarimeter. Protein fractions at 0.1-0.5  
314 mg/mL were tested in 20 mM NaPi, pH 6.5 and 63.6 mM NaCl. CD signal was recorded every  
315 0.2 nm at a speed of 50 nm/min. Data were collected with standard sensitivity (100 mdeg). Four  
316 different scans were performed for each construct, which were later averaged to obtain the final  
317 spectra. The absorbance contribution of the buffer (baseline spectrum) was subtracted from the  
318 protein spectra, which were finally normalized according to the protein concentration. Protein  
319 concentrations were estimated from A<sub>280</sub> measurements considering theoretical extinction  
320 coefficients according to ProtParam Tool (**Supplementary File S1**)<sup>86</sup>. To examine thermal  
321 stability, protein samples were heated at 30°C/h from 25 to 85°C using a Peltier temperature  
322 controller while recording CD signal at 215 nm (0.5°C data pitch). The recorded CD signal  
323 changes as the protein denatures and unfolds, and the melting temperature (T<sub>m</sub>) was calculated by  
324 performing a sigmoidal fitting to the denaturing curves using IGOR Pro (Wavemetrics).

325

### 326 **Single-molecule atomic force spectroscopy**

327 Single-molecule AFM experiments were done in an AFS force-clamp spectrometer (Luigs &  
328 Neumann)<sup>41</sup>. 1-20 uL of a 0.04-1.5 mg/mL solution of the purified polyprotein in 10 mM Hepes,  
329 pH 7.2, 150 mM NaCl, 1 mM EDTA buffer were deposited onto a gold-coated cover slip (Luigs  
330 & Neumann). We used silicon nitride MLCT cantilevers (Bruker AFM Probes), with reflective  
331 60-nm gold coating on their back side. These cantilevers were calibrated using the thermal  
332 fluctuations method<sup>87</sup>. Typical spring constants were in the range of 15-20 pN/nm. Single  
333 polyproteins were picked up by pressing the cantilever onto the gold surface at a contact force of  
334 500-2000 pN for 0.8-2 s, and subject to 40 pN/s linear increase in force until their detachment.  
335 During this stretching, the length of the polyprotein is measured and unfolding events are detected  
336 as specific stepwise increases in extension. The mechanical unfolding of C3 domains results in  
337 steps of 24-25 nm; only traces containing two or more unfolding events and with detachment  
338 forces >175 pN were analyzed<sup>45</sup>. Traces where the fingerprint was interrupted by unidentifiable  
339 events were discarded. Unfolding forces were recorded in at least three different experiments  
340 performed with different cantilevers. Only experiments with low laser interference (peak-to-peak  
341 height in baseline force-extension traces lower than 25 pN) were included in the analysis of  
342 unfolding forces<sup>41</sup>. Mean unfolding forces were obtained from Gaussian fits to histograms of  
343 unfolding forces. Some of the unfolding data for wild-type C3 have also been included in a  
344 technical report<sup>45</sup>. Distributions were also fit to the Bell's model of protein unfolding under a  
345 force ramp to get the value of the unfolding rate at zero force,  $r_0$ , and the distance to the transition  
346 state,  $\Delta x$ <sup>51</sup>. For folding experiments, we programmed a force regime consisting of two ramps  
347 separated by a *quench* pulse. To quantify folding rates, we calculated folding fractions at different  
348 quench times. The bootstrap method was used to estimate standard errors of the mean for the  
349 folding fractions<sup>53</sup>. Time courses of folding were fit to an exponential function,

350

351

$$F_r(t) = R(1 - e^{-r_f t}) \quad \text{Equation 2}$$

352

353 where  $F_r(t)$  is the folding fraction as a function of time,  $R$  if the maximum folding fraction and  
354  $r_f$  is the folding rate. Fits considered that the folding reaction was complete at 40 s. Values of  
355  $R < 1$  in the folding of Ig domains are common and are due to misfolded states that are highly  
356 dependent on experimental conditions<sup>54, 88</sup>. Hence, we focused on folding rates, which is a more  
357 robust molecular parameter. Analysis was done in IGOR Pro (Wavemetrics).

358

### 359 **Statistics**

360 Statistical significance of the differences in parameters between WT and mutant domains were  
361 inferred from 83% confidence intervals, which were estimated using IGOR Pro (**Supplementary**  
362 **File S1, Table 1**). No overlapping intervals suggest that the null hypothesis can be rejected with  
363  $p < 0.05$ <sup>89-90</sup>.

364

365 **Supplementary Information** is available in the online version of the article. Supplementary info  
366 includes 1 Supplementary File, 1 Supplementary Text, 6 Supplementary Figures, and  
367 Supplementary References.

368

### 369 **Acknowledgements**

370 JAC acknowledges funding from the *Ministerio de Ciencia e Innovación* (MCIN) through grants  
371 BIO2014-54768-P, BIO2017-83640-P (AEI/FEDER, UE), EIN2019-102966, RYC-2014-16604,  
372 and BFU2017-90692-REDT, the European Research Area Network on Cardiovascular Diseases  
373 (ERA-CVD/ISCIII, MINOTAUR, AC16/00045) and the *Comunidad de Madrid* (consortium  
374 Tec4Bio-CM, S2018/NMT-4443, FEDER). The CNIC is supported by the *Instituto de Salud*  
375 *Carlos III* (ISCIII), MCIN and the Pro CNIC Foundation, and is a Severo Ochoa Center of  
376 Excellence (SEV-2015-0505). We acknowledge funding from ISCIII to the *Centro de*  
377 *Investigación Biomédica en Red* (CIBERCV), CB16/11/00425. CSC is the recipient of an FPI-  
378 SO predoctoral fellowship BES-2016-076638. MRP was the recipient of a PhD fellowship from  
379 the Italian Ministry of Education, Universities and Research (MIUR). CPL was a recipient of  
380 CNIC Master Fellowship. We thank Natalia Vicente for excellent technical support (through grant  
381 PEJ16/MED/TL-1593 from *Consejería de Educación, Juventud y Deporte de la Comunidad de*  
382 *Madrid* and the European Social Fund). We thank the Spectroscopy and Nuclear Magnetic  
383 Resonance Core Unit at CNIO for access to CD instrumentation. We thank Andrea Thompson  
384 and Sharlene Day for their insights. We thank all members of the *Molecular Mechanics of the*  
385 *Cardiovascular System* team for helpful discussions.

386

### 387 **Author contribution**

388 JAC conceived the project. DSO, SV, FD, GF, PGP and JAC ensured procurement of human  
389 samples. MRP did experimental analysis of RNA splicing. CSC and DVC cloned and purified  
390 proteins. CSC and EHG did circular dichroism experiments. CSC, CPL, IUI and JAC did single-  
391 molecule AFM experiments. CSC, MRP, DSO, LM, EHG and JAC interpreted data in the context  
392 of the available literature. CSC and JAC drafted the manuscript with input from all authors.

393

### 394 **Competing financial interests**

395 LM is share-holder of Health in Code.

396

397 **References**

- 398 1. Gautel, M.; Djinovic-Carugo, K., The sarcomeric cytoskeleton: from molecules to  
399 motion. *J Exp Biol* **2016**, *219* (Pt 2), 135-45.
- 400 2. Braunwald, E., Hypertrophic cardiomyopathy. S.S.Naidu, Ed. 2015; pp 1-8.
- 401 3. Semsarian, C.; Ingles, J.; Maron, M. S.; Maron, B. J., New perspectives on the  
402 prevalence of hypertrophic cardiomyopathy. *Journal of the American College of Cardiology*  
403 **2015**, *65* (12), 1249-1254.
- 404 4. Teekakirikul, P.; Zhu, W.; Huang, H. C.; Fung, E., Hypertrophic Cardiomyopathy: An  
405 Overview of Genetics and Management. *Biomolecules* **2019**, *9* (12).
- 406 5. Roma-Rodrigues, C.; Fernandes, A. R., Genetics of hypertrophic cardiomyopathy:  
407 advances and pitfalls in molecular diagnosis and therapy. *The application of clinical genetics*  
408 **2014**, *7*, 195-208.
- 409 6. Alcalai, R.; Seidman, J. G.; Seidman, C. E., Genetic basis of hypertrophic  
410 cardiomyopathy: from bench to the clinics. *Journal of cardiovascular electrophysiology* **2008**,  
411 *19* (1), 104-10.
- 412 7. Ho, C. Y.; Mealiffe, M. E.; Bach, R. G.; Bhattacharya, M.; Choudhury, L.; Edelberg, J. M.;  
413 Hegde, S. M.; Jacoby, D.; Lakdawala, N. K.; Lester, S. J.; Ma, Y.; Marian, A. J.; Nagueh, S. F.;  
414 Owens, A.; Rader, F.; Saberi, S.; Sehnert, A. J.; Sherrid, M. V.; Solomon, S. D.; Wang, A.; Wever-  
415 Pinzon, O.; Wong, T. C.; Heitner, S. B., Evaluation of Mavacamten in Symptomatic Patients  
416 With Nonobstructive Hypertrophic Cardiomyopathy. *Journal of the American College of*  
417 *Cardiology* **2020**, *75* (21), 2649-2660.
- 418 8. Akhtar, M.; Elliott, P., The genetics of hypertrophic cardiomyopathy. *Global cardiology*  
419 *science & practice* **2018**, *2018* (3), 36.
- 420 9. Marston, S. B., How do mutations in contractile proteins cause the primary familial  
421 cardiomyopathies? *Journal of cardiovascular translational research* **2011**, *4* (3), 245-55.
- 422 10. Squire, J. M., Muscle contraction: Sliding filament history, sarcomere dynamics and the  
423 two Huxleys. *Global cardiology science & practice* **2016**, *2016* (2), e201611.
- 424 11. Krans, J. L., The Sliding Filament Theory of Muscle Contraction. *Nature Education* **2010**,  
425 *3* (9).
- 426 12. Spudich, J. A., The myosin swinging cross-bridge model. *Nature reviews. Molecular cell*  
427 *biology* **2001**, *2* (5), 387-92.
- 428 13. Harris, S. P.; Lyons, R. G.; Bezold, K. L., In the thick of it: HCM-causing mutations in  
429 myosin binding proteins of the thick filament. *Circulation research* **2011**, *108* (6), 751-64.
- 430 14. Previs, M. J.; Michalek, A. J.; Warshaw, D. M., Molecular modulation of actomyosin  
431 function by cardiac myosin-binding protein C. *Pflugers Archiv : European journal of physiology*  
432 **2014**, *466* (3), 439-44.
- 433 15. Heling, L.; Geeves, M. A.; Kad, N. M., MyBP-C: one protein to govern them all. *Journal*  
434 *of muscle research and cell motility* **2020**.
- 435 16. Lee, K.; Harris, S. P.; Sadayappan, S.; Craig, R., Orientation of myosin binding protein C  
436 in the cardiac muscle sarcomere determined by domain-specific immuno-EM. *J Mol Biol* **2015**,  
437 *427* (2), 274-86.
- 438 17. Pfuhl, M.; Gautel, M., Structure, interactions and function of the N-terminus of cardiac  
439 myosin binding protein C (MyBP-C): who does what, with what, and to whom? *Journal of*  
440 *muscle research and cell motility* **2012**, *33* (1), 83-94.
- 441 18. Flashman, E.; Redwood, C.; Moolman-Smook, J.; Watkins, H., Cardiac myosin binding  
442 protein C: its role in physiology and disease. *Circulation research* **2004**, *94* (10), 1279-89.
- 443 19. Carrier, L.; Mearini, G.; Stathopoulou, K.; Cuello, F., Cardiac myosin-binding protein C  
444 (MYBPC3) in cardiac pathophysiology. *Gene* **2015**, *573* (2), 188-97.
- 445 20. Irving, T. C.; Konhilas, J.; Perry, D.; Fischetti, R.; de Tombe, P. P., Myofilament lattice  
446 spacing as a function of sarcomere length in isolated rat myocardium. *Am J Physiol Heart Circ*  
447 *Physiol* **2000**, *279* (5), H2568-73.

- 448 21. Weith, A.; Sadayappan, S.; Gulick, J.; Previs, M. J.; Vanburen, P.; Robbins, J.; Warshaw,  
449 D. M., Unique single molecule binding of cardiac myosin binding protein-C to actin and  
450 phosphorylation-dependent inhibition of actomyosin motility requires 17 amino acids of the  
451 motif domain. *J Mol Cell Cardiol* **2012**, *52* (1), 219-27.
- 452 22. de Tombe, P. P.; ter Keurs, H. E., The velocity of cardiac sarcomere shortening:  
453 mechanisms and implications. *Journal of muscle research and cell motility* **2012**, *33* (6), 431-7.
- 454 23. Previs, M. J.; Beck Previs, S.; Gulick, J.; Robbins, J.; Warshaw, D. M., Molecular  
455 mechanics of cardiac myosin-binding protein C in native thick filaments. *Science* **2012**, *337*  
456 (6099), 1215-8.
- 457 24. Karsai, A.; Kellermayer, M. S.; Harris, S. P., Mechanical unfolding of cardiac myosin  
458 binding protein-C by atomic force microscopy. *Biophys J* **2011**, *101* (8), 1968-77.
- 459 25. Karsai, A.; Kellermayer, M. S.; Harris, S. P., Cross-species mechanical fingerprinting of  
460 cardiac myosin binding protein-C. *Biophys J* **2013**, *104* (11), 2465-75.
- 461 26. Michalek, A. J.; Howarth, J. W.; Gulick, J.; Previs, M. J.; Robbins, J.; Rosevear, P. R.;  
462 Warshaw, D. M., Phosphorylation modulates the mechanical stability of the cardiac myosin-  
463 binding protein C motif. *Biophys J* **2013**, *104* (2), 442-52.
- 464 27. Zhang, X. L.; De, S.; McIntosh, L. P.; Paetzel, M., Structural characterization of the C3  
465 domain of cardiac myosin binding protein C and its hypertrophic cardiomyopathy-related  
466 R502W mutant. *Biochemistry* **2014**, *53* (32), 5332-42.
- 467 28. Behrens-Gawlik, V.; Mearini, G.; Gedicke-Hornung, C.; Richard, P.; Carrier, L., MYBPC3  
468 in hypertrophic cardiomyopathy: from mutation identification to RNA-based correction.  
469 *Pflugers Archiv : European journal of physiology* **2014**, *466* (2), 215-23.
- 470 29. Marston, S.; Copeland, O.; Jacques, A.; Livesey, K.; Tsang, V.; McKenna, W. J.;  
471 Jalilzadeh, S.; Carballo, S.; Redwood, C.; Watkins, H., Evidence from human myectomy samples  
472 that MYBPC3 mutations cause hypertrophic cardiomyopathy through haploinsufficiency.  
473 *Circulation research* **2009**, *105* (3), 219-22.
- 474 30. van Dijk, S. J.; Dooijes, D.; dos Remedios, C.; Michels, M.; Lamers, J. M.; Winegrad, S.;  
475 Schlossarek, S.; Carrier, L.; ten Cate, F. J.; Stienen, G. J.; van der Velden, J., Cardiac myosin-  
476 binding protein C mutations and hypertrophic cardiomyopathy: haploinsufficiency, deranged  
477 phosphorylation, and cardiomyocyte dysfunction. *Circulation* **2009**, *119* (11), 1473-83.
- 478 31. Helms, A. S.; Davis, F. M.; Coleman, D.; Bartolone, S. N.; Glazier, A. A.; Pagani, F.; Yob, J.  
479 M.; Sadayappan, S.; Pedersen, E.; Lyons, R.; Westfall, M. V.; Jones, R.; Russell, M. W.; Day, S.  
480 M., Sarcomere mutation-specific expression patterns in human hypertrophic cardiomyopathy.  
481 *Circulation. Cardiovascular genetics* **2014**, *7* (4), 434-43.
- 482 32. Barefield, D.; Kumar, M.; Gorham, J.; Seidman, J. G.; Seidman, C. E.; de Tombe, P. P.;  
483 Sadayappan, S., Haploinsufficiency of MYBPC3 exacerbates the development of hypertrophic  
484 cardiomyopathy in heterozygous mice. *J Mol Cell Cardiol* **2015**, *79*, 234-43.
- 485 33. Helms, A. S.; Tang, V. T.; O'Leary, T. S.; Friedline, S.; Wauchope, M.; Arora, A.;  
486 Wasserman, A. H.; Smith, E. D.; Lee, L. M.; Wen, X. W.; Shavit, J. A.; Liu, A. P.; Previs, M. J.; Day,  
487 S. M., Effects of MYBPC3 loss-of-function mutations preceding hypertrophic cardiomyopathy.  
488 *JCI insight* **2020**, *5* (2).
- 489 34. Parbhudayal, R. Y.; Garra, A. R.; Gotte, M. J. W.; Michels, M.; Pei, J.; Harakalova, M.;  
490 Asselbergs, F. W.; van Rossum, A. C.; van der Velden, J.; Kuster, D. W. D., Variable cardiac  
491 myosin binding protein-C expression in the myofilaments due to MYBPC3 mutations in  
492 hypertrophic cardiomyopathy. *J Mol Cell Cardiol* **2018**, *123*, 59-63.
- 493 35. Ababou, A.; Gautel, M.; Pfuhl, M., Dissecting the N-terminal myosin binding site of  
494 human cardiac myosin-binding protein C. Structure and myosin binding of domain C2. *J Biol*  
495 *Chem* **2007**, *282* (12), 9204-15.
- 496 36. Ababou, A.; Rostkova, E.; Mistry, S.; Le Masurier, C.; Gautel, M.; Pfuhl, M., Myosin  
497 binding protein C positioned to play a key role in regulation of muscle contraction: structure  
498 and interactions of domain C1. *J Mol Biol* **2008**, *384* (3), 615-30.

- 499 37. De Lange, W. J.; Grimes, A. C.; Hegge, L. F.; Spring, A. M.; Brost, T. M.; Ralphe, J. C.,  
500 E258K HCM-causing mutation in cardiac MyBP-C reduces contractile force and accelerates  
501 twitch kinetics by disrupting the cMyBP-C and myosin S2 interaction. *J Gen Physiol* **2013**, *142*  
502 (3), 241-55.
- 503 38. Pricolo, M. R.; Herrero-Galan, E.; Mazzaccara, C.; Losi, M. A.; Alegre-Cebollada, J.;  
504 Frisso, G., Protein Thermodynamic Destabilization in the Assessment of Pathogenicity of a  
505 Variant of Uncertain Significance in Cardiac Myosin Binding Protein C. *Journal of cardiovascular*  
506 *translational research* **2020**.
- 507 39. Smelter, D. F.; de Lange, W. J.; Cai, W.; Ge, Y.; Ralphe, J. C., The HCM-linked W792R  
508 mutation in cardiac myosin-binding protein C reduces C6 FnIII domain stability. *Am J Physiol*  
509 *Heart Circ Physiol* **2018**, *314* (6), H1179-H1191.
- 510 40. Suay-Corredera, C.; Pricolo, M. R.; Herrero-Galan, E.; Velazquez-Carreras, D.; Sanchez-  
511 Ortiz, D.; Garcia-Giustiniani, D.; Delgado, J.; Galano-Frutos, J. J.; Garcia-Cebollada, H.; Vilches,  
512 S.; Dominguez, F.; Sabater Molina, M.; Barriales-Villa, R.; Frisso, G.; Sancho, J.; Serrano, L.;  
513 Garcia-Pavia, P.; Monserrat, L.; Alegre-Cebollada, J., Protein haploinsufficiency drivers identify  
514 MYBPC3 mutations that cause hypertrophic cardiomyopathy. *medRxiv* **2020**.
- 515 41. Popa, I.; Kosuri, P.; Alegre-Cebollada, J.; Garcia-Manyes, S.; Fernandez, J. M., Force  
516 dependency of biochemical reactions measured by single-molecule force-clamp spectroscopy.  
517 *Nat Protoc* **2013**, *8* (7), 1261-76.
- 518 42. Carrier, L.; Bonne, G.; Bahrend, E.; Yu, B.; Richard, P.; Niel, F.; Hainque, B.; Cruaud, C.;  
519 Gary, F.; Labeit, S.; Bouhour, J. B.; Dubourg, O.; Desnos, M.; Hagege, A. A.; Trent, R. J.;  
520 Komajda, M.; Fiszman, M.; Schwartz, K., Organization and sequence of human cardiac myosin  
521 binding protein C gene (MYBPC3) and identification of mutations predicted to produce  
522 truncated proteins in familial hypertrophic cardiomyopathy. *Circulation research* **1997**, *80* (3),  
523 427-34.
- 524 43. Sadayappan, S.; de Tombe, P. P., Cardiac myosin binding protein-C: redefining its  
525 structure and function. *Biophys Rev* **2012**, *4* (2), 93-106.
- 526 44. Ackermann, M. A.; Kontogianni-Konstantopoulos, A., Myosin binding protein-C: a  
527 regulator of actomyosin interaction in striated muscle. *Journal of biomedicine & biotechnology*  
528 **2011**, *2011*, 636403.
- 529 45. Pimenta-Lopes, C.; Suay-Corredera, C.; Velázquez-Carreras, D.; Sánchez-Ortiz, D.;  
530 Alegre-Cebollada, J., Concurrent atomic force spectroscopy. *Communications Physics* **2019**, *2*  
531 (1), 91.
- 532 46. Marston, S.; Copeland, O.; Gehmlich, K.; Schlossarek, S.; Carrier, L., How do MYBPC3  
533 mutations cause hypertrophic cardiomyopathy? *Journal of muscle research and cell motility*  
534 **2012**, *33* (1), 75-80.
- 535 47. Ito, K.; Patel, P. N.; Gorham, J. M.; McDonough, B.; DePalma, S. R.; Adler, E. E.; Lam, L.;  
536 MacRae, C. A.; Mohiuddin, S. M.; Fatkin, D.; Seidman, C. E.; Seidman, J. G., Identification of  
537 pathogenic gene mutations in LMNA and MYBPC3 that alter RNA splicing. *Proc Natl Acad Sci U*  
538 *S A* **2017**, *114* (29), 7689-7694.
- 539 48. Greenfield, N. J., Using circular dichroism spectra to estimate protein secondary  
540 structure. *Nat Protoc* **2006**, *1* (6), 2876-90.
- 541 49. Kelly, S. M.; Price, N. C., The use of circular dichroism in the investigation of protein  
542 structure and function. *Curr Protein Pept Sci* **2000**, *1* (4), 349-84.
- 543 50. Watkins, H.; Ashrafian, H.; Redwood, C., Inherited cardiomyopathies. *N Engl J Med*  
544 **2011**, *364* (17), 1643-56.
- 545 51. Schlierf, M.; Li, H.; Fernandez, J. M., The unfolding kinetics of ubiquitin captured with  
546 single-molecule force-clamp techniques. *Proc Natl Acad Sci U S A* **2004**, *101* (19), 7299-304.
- 547 52. Bell, G. I., Models for the specific adhesion of cells to cells. *Science* **1978**, *200* (4342),  
548 618-27.



- 549 53. Kosuri, P.; Alegre-Cebollada, J.; Feng, J.; Kaplan, A.; Ingles-Prieto, A.; Badilla, C. L.;  
550 Stockwell, B. R.; Sanchez-Ruiz, J. M.; Holmgren, A.; Fernandez, J. M., Protein folding drives  
551 disulfide formation. *Cell* **2012**, *151* (4), 794-806.
- 552 54. Alegre-Cebollada, J.; Kosuri, P.; Giganti, D.; Eckels, E.; Rivas-Pardo, J. A.; Hamdani, N.;  
553 Warren, C. M.; Solaro, R. J.; Linke, W. A.; Fernandez, J. M., S-glutathionylation of cryptic  
554 cysteines enhances titin elasticity by blocking protein folding. *Cell* **2014**, *156* (6), 1235-1246.
- 555 55. Davis, J.; Davis, L. C.; Correll, R. N.; Makarewich, C. A.; Schwanekamp, J. A.; Moussavi-  
556 Harami, F.; Wang, D.; York, A. J.; Wu, H.; Houser, S. R.; Seidman, C. E.; Seidman, J. G.; Regnier,  
557 M.; Metzger, J. M.; Wu, J. C.; Molkentin, J. D., A Tension-Based Model Distinguishes  
558 Hypertrophic versus Dilated Cardiomyopathy. *Cell* **2016**, *165* (5), 1147-1159.
- 559 56. Spudich, J. A., The myosin mesa and a possible unifying hypothesis for the molecular  
560 basis of human hypertrophic cardiomyopathy. *Biochem Soc Trans* **2015**, *43* (1), 64-72.
- 561 57. Toepfer, C. N.; Wakimoto, H.; Garfinkel, A. C.; McDonough, B.; Liao, D.; Jiang, J.; Tai, A.  
562 C.; Gorham, J. M.; Lunde, I. G.; Lun, M.; Lynch, T. L. t.; McNamara, J. W.; Sadayappan, S.;  
563 Redwood, C. S.; Watkins, H. C.; Seidman, J. G.; Seidman, C. E., Hypertrophic cardiomyopathy  
564 mutations in MYBPC3 dysregulate myosin. *Sci Transl Med* **2019**, *11* (476).
- 565 58. Moss, R. L.; Fitzsimons, D. P.; Ralphe, J. C., Cardiac MyBP-C regulates the rate and force  
566 of contraction in mammalian myocardium. *Circulation research* **2015**, *116* (1), 183-92.
- 567 59. Green, E. M.; Wakimoto, H.; Anderson, R. L.; Evanchik, M. J.; Gorham, J. M.; Harrison,  
568 B. C.; Henze, M.; Kawas, R.; Oslob, J. D.; Rodriguez, H. M.; Song, Y.; Wan, W.; Leinwand, L. A.;  
569 Spudich, J. A.; McDowell, R. S.; Seidman, J. G.; Seidman, C. E., A small-molecule inhibitor of  
570 sarcomere contractility suppresses hypertrophic cardiomyopathy in mice. *Science* **2016**, *351*  
571 (6273), 617-21.
- 572 60. Adhikari, A. S.; Kooiker, K. B.; Sarkar, S. S.; Liu, C.; Bernstein, D.; Spudich, J. A.; Ruppel,  
573 K. M., Early-Onset Hypertrophic Cardiomyopathy Mutations Significantly Increase the Velocity,  
574 Force, and Actin-Activated ATPase Activity of Human beta-Cardiac Myosin. *Cell reports* **2016**,  
575 *17* (11), 2857-2864.
- 576 61. Adhikari, A. S.; Trivedi, D. V.; Sarkar, S. S.; Song, D.; Kooiker, K. B.; Bernstein, D.;  
577 Spudich, J. A.; Ruppel, K. M.,  $\beta$ -Cardiac myosin hypertrophic cardiomyopathy mutations release  
578 sequestered heads and increase enzymatic activity. *Nature Communications* **2019**, *10* (1),  
579 2685.
- 580 62. McNamara, J. W.; Li, A.; Lal, S.; Bos, J. M.; Harris, S. P.; van der Velden, J.; Ackerman,  
581 M. J.; Cooke, R.; dos Remedios, C. G., MYBPC3 mutations are associated with a reduced super-  
582 relaxed state in patients with hypertrophic cardiomyopathy. *PLOS ONE* **2017**, *12* (6), e0180064.
- 583 63. McNamara, J. W.; Singh, R. R.; Sadayappan, S., Cardiac myosin binding protein-C  
584 phosphorylation regulates the super-relaxed state of myosin. *Proc Natl Acad Sci U S A* **2019**,  
585 *116* (24), 11731-11736.
- 586 64. Wijnker, P. J. M.; Friedrich, F. W.; Dutsch, A.; Reischmann, S.; Eder, A.; Mannhardt, I.;  
587 Mearini, G.; Eschenhagen, T.; van der Velden, J.; Carrier, L., Comparison of the effects of a  
588 truncating and a missense MYBPC3 mutation on contractile parameters of engineered heart  
589 tissue. *Journal of Molecular and Cellular Cardiology* **2016**, *97*, 82-92.
- 590 65. Luther, P. K.; Winkler, H.; Taylor, K.; Zoghbi, M. E.; Craig, R.; Padrón, R.; Squire, J. M.;  
591 Liu, J., Direct visualization of myosin-binding protein C bridging myosin and actin filaments in  
592 intact muscle. *Proceedings of the National Academy of Sciences* **2011**, *108* (28), 11423.
- 593 66. Walcott, S.; Docken, S.; Harris, Samantha P., Effects of Cardiac Myosin Binding Protein-  
594 C on Actin Motility Are Explained with a Drag-Activation-Competition Model. *Biophysical*  
595 *Journal* **2015**, *108* (1), 10-13.
- 596 67. Smith, S. B.; Finzi, L.; Bustamante, C., Direct mechanical measurements of the elasticity  
597 of single DNA molecules by using magnetic beads. *Science* **1992**, *258* (5085), 1122-6.
- 598 68. Li, H.; Linke, W. A.; Oberhauser, A. F.; Carrion-Vazquez, M.; Kerkvliet, J. G.; Lu, H.;  
599 Marszalek, P. E.; Fernandez, J. M., Reverse engineering of the giant muscle protein titin. *Nature*  
600 **2002**, *418* (6901), 998-1002.

- 601 69. Rivas-Pardo, J. A.; Eckels, E. C.; Popa, I.; Kosuri, P.; Linke, W. A.; Fernandez, J. M., Work  
602 Done by Titin Protein Folding Assists Muscle Contraction. *Cell reports* **2016**, *14* (6), 1339-47.
- 603 70. Mun, J. Y.; Kensler, R. W.; Harris, S. P.; Craig, R., The cMyBP-C HCM variant L348P  
604 enhances thin filament activation through an increased shift in tropomyosin position. *Journal*  
605 *of Molecular and Cellular Cardiology* **2016**, *91*, 141-147.
- 606 71. Gruen, M.; Gautel, M., Mutations in  $\beta$ -myosin S2 that cause familial hypertrophic  
607 cardiomyopathy (FHC) abolish the interaction with the regulatory domain of myosin-binding  
608 protein-C11 Edited by J. Karn. *Journal of Molecular Biology* **1999**, *286* (3), 933-949.
- 609 72. del Rio, A.; Perez-Jimenez, R.; Liu, R.; Roca-Cusachs, P.; Fernandez, J. M.; Sheetz, M. P.,  
610 Stretching single talin rod molecules activates vinculin binding. *Science* **2009**, *323* (5914), 638-  
611 41.
- 612 73. van Dijk, S. J.; Bezold Kooiker, K.; Mazzalupo, S.; Yang, Y.; Kostyukova, A. S.; Mustacich,  
613 D. J.; Hoye, E. R.; Stern, J. A.; Kittleson, M. D.; Harris, S. P., The A31P missense mutation in  
614 cardiac myosin binding protein C alters protein structure but does not cause  
615 haploinsufficiency. *Arch Biochem Biophys* **2016**, *601*, 133-40.
- 616 74. Schlossarek, S.; Carrier, L., The ubiquitin-proteasome system in cardiomyopathies. *Curr*  
617 *Opin Cardiol* **2011**, *26* (3), 190-5.
- 618 75. Glazier, A. A.; Hafeez, N.; Mellacheruvu, D.; Basrur, V.; Nesvizhskii, A. I.; Lee, L. M.;  
619 Shao, H.; Tang, V.; Yob, J. M.; Gestwicki, J. E.; Helms, A. S.; Day, S. M., HSC70 is a chaperone for  
620 wild-type and mutant cardiac myosin binding protein C. *JCI insight* **2018**, *3* (11).
- 621 76. Wang, L.; Lai, G.; Chu, G.; Liang, X.; Zhao, Y., cMyBP-C was decreased via KLHL3-  
622 mediated proteasomal degradation in congenital heart diseases. *Exp Cell Res* **2017**, *355* (1), 18-  
623 25.
- 624 77. Chen, B.; Retzlaff, M.; Roos, T.; Frydman, J., Cellular strategies of protein quality  
625 control. *Cold Spring Harb Perspect Biol* **2011**, *3* (8), a004374.
- 626 78. Anderson, B. R.; Bogomolovas, J.; Labeit, S.; Granzier, H., Single molecule force  
627 spectroscopy on titin implicates immunoglobulin domain stability as a cardiac disease  
628 mechanism. *The Journal of biological chemistry* **2013**, *288* (8), 5303-15.
- 629 79. Haining, A. W. M.; Lieberthal, T. J.; del Río Hernández, A., Talin: a mechanosensitive  
630 molecule in health and disease. *The FASEB Journal* **2016**, *30* (6), 2073-2085.
- 631 80. Nakamura, F.; Stossel, T. P.; Hartwig, J. H., The filamins. *Cell Adhesion & Migration*  
632 **2011**, *5* (2), 160-169.
- 633 81. Schreiber, Katherine H.; Kennedy, Brian K., When Lamins Go Bad: Nuclear Structure  
634 and Disease. *Cell* **2013**, *152* (6), 1365-1375.
- 635 82. Leckband, D. E.; de Rooij, J., Cadherin Adhesion and Mechanotransduction. *Annual*  
636 *Review of Cell and Developmental Biology* **2014**, *30* (1), 291-315.
- 637 83. Popa, I.; Rivas-Pardo, J. A.; Eckels, E. C.; Echelman, D. J.; Badilla, C. L.; Valle-Orero, J.;  
638 Fernandez, J. M., A HaloTag Anchored Ruler for Week-Long Studies of Protein Dynamics. *J Am*  
639 *Chem Soc* **2016**, *138* (33), 10546-53.
- 640 84. Carrion-Vazquez, M.; Oberhauser, A. F.; Fowler, S. B.; Marszalek, P. E.; Broedel, S. E.;  
641 Clarke, J.; Fernandez, J. M., Mechanical and chemical unfolding of a single protein: a  
642 comparison. *Proc Natl Acad Sci U S A* **1999**, *96* (7), 3694-9.
- 643 85. Alegre-Cebollada, J.; Badilla, C. L.; Fernandez, J. M., Isopeptide bonds block the  
644 mechanical extension of pili in pathogenic *Streptococcus pyogenes*. *J Biol Chem* **2010**, *285* (15),  
645 11235-42.
- 646 86. Gasteiger, E.; Hoogland, C.; Gattiker, A.; Duvaud, S. e.; Wilkins, M. R.; Appel, R. D.;  
647 Bairoch, A., Protein Identification and Analysis Tools on the ExpASy Server. In *The Proteomics*  
648 *Protocols Handbook*, Walker, J. M., Ed. Humana Press: Totowa, NJ, 2005; pp 571-607.
- 649 87. Hutter, J.; Bechhoefer, J., Calibration of Atomic-Force Microscope Tips. *Review of*  
650 *Scientific Instruments* **1993**, *64*, 1868-1873.
- 651 88. Nunes, J. M.; Mayer-Hartl, M.; Hartl, F. U.; Muller, D. J., Action of the Hsp70 chaperone  
652 system observed with single proteins. *Nat Commun* **2015**, *6*, 6307.

- 653 89. Payton, M. E.; Greenstone, M. H.; Schenker, N., Overlapping confidence intervals or  
654 standard error intervals: what do they mean in terms of statistical significance? *J Insect Sci*  
655 **2003**, 3, 34.
- 656 90. Goldstein, H.; Michael, J. R. H., The Graphical Presentation of a Collection of Means.  
657 *Journal of the Royal Statistical Society. Series A (Statistics in Society)* **1995**, 158 (1), 175-177.
- 658
